# Supplementary material for: Estimates and Determinants of SARS-Cov-2 Seroprevalence and Infection Fatality Ratio Using Latent Class Analysis: The Population-Based Tirschenreuth Study in the Hardest-Hit German County in Spring 2020
Source: MDPI journal article supplement (doi:10.3390/v13061118), 2021-06-10
Supplement: s1 [file s1]

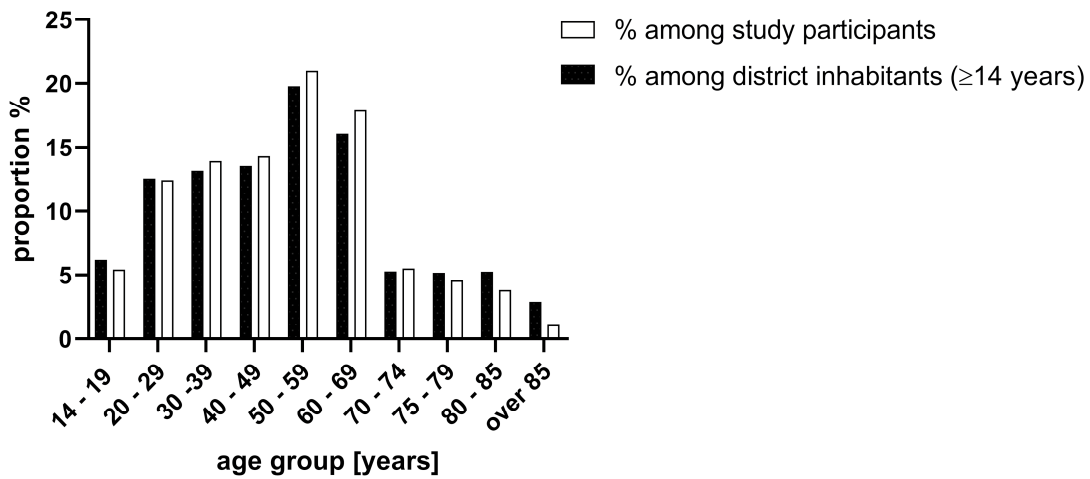

**Figure S1.** Proportion (%) of TiKoCo-19 study participants versus county population in the various age groups.

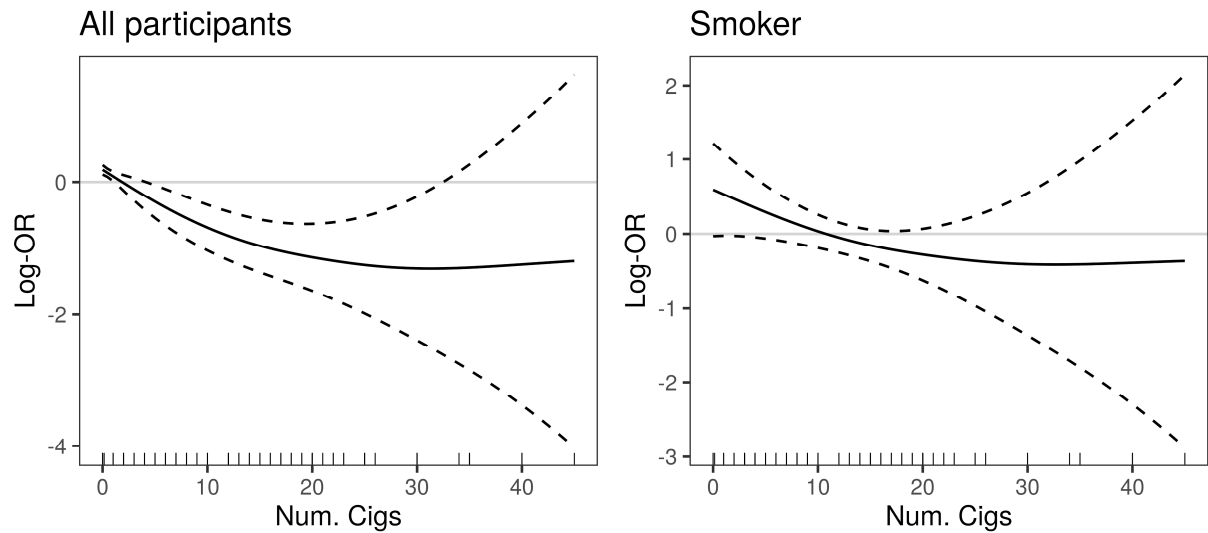

**Figure S2.** Non-linear association of number of cigarettes with seropositivity. Log-OR are shown for all participants and active smokers. 95%-CI are indicated.
