# Supplementary material for: Estimates and Determinants of SARS-Cov-2 Seroprevalence and Infection Fatality Ratio Using Latent Class Analysis: The Population-Based Tirschenreuth Study in the Hardest-Hit German County in Spring 2020
Source: MDPI journal article supplement (doi:10.3390/v13061118), 2021-06-10
Supplement: s1 [file s1]

**Supplemental Table S1:** Distribution of the inhabitants of the county of Tirschenreuth and of the study participants (n = 64 643 of inhabitants of Tirschenreuth county aged  $\geq 14$  years and 4 203 study participants, respectively)

|                              | Number of<br>inhabitants in the<br>county | % (among<br>county<br>inhabitants aged<br>$\geq 14$ years) | Number of<br>study<br>participants | % (among study<br>participants) | absolute deviation<br>between study and<br>county (%) |
|------------------------------|-------------------------------------------|------------------------------------------------------------|------------------------------------|---------------------------------|-------------------------------------------------------|
| <b>Gender analysis</b>       |                                           |                                                            |                                    |                                 |                                                       |
| men                          | 32239                                     | 49.87                                                      | 2032                               | 48.35                           | -1.52                                                 |
| women                        | 32404                                     | 50.13                                                      | 2171                               | 51.65                           | 1.52                                                  |
| <b>Age group analysis</b>    |                                           |                                                            |                                    |                                 |                                                       |
| 14 - 19                      | 3994                                      | 6.17                                                       | 227                                | 5.40                            | -0.77                                                 |
| 20 - 29                      | 8146                                      | 12.58                                                      | 523                                | 12.44                           | -0.14                                                 |
| 30 - 39                      | 8430                                      | 13.18                                                      | 585                                | 13.92                           | 0.74                                                  |
| 40 - 49                      | 8782                                      | 13.56                                                      | 601                                | 14.30                           | 0.74                                                  |
| 50 - 59                      | 12813                                     | 19.79                                                      | 882                                | 20.99                           | 1.20                                                  |
| 60 - 69                      | 10412                                     | 16.08                                                      | 752                                | 17.89                           | 1.81                                                  |
| 70 - 74                      | 3422                                      | 5.29                                                       | 232                                | 5.52                            | 0.23                                                  |
| 75 - 79                      | 3350                                      | 5.17                                                       | 192                                | 4.57                            | -0.60                                                 |
| 80 - 84                      | 3412                                      | 5.27                                                       | 161                                | 3.83                            | -1.44                                                 |
| $\geq 85$                    | 1882                                      | 2.91                                                       | 48                                 | 1.14                            | -1.77                                                 |
| <b>Municipality analysis</b> |                                           |                                                            |                                    |                                 |                                                       |
| Bad Neualbenreuth            | 1186                                      | 1.83                                                       | 93                                 | 2.21                            | 0.38                                                  |
| Bärnau                       | 2795                                      | 4.32                                                       | 189                                | 4.50                            | 0.18                                                  |
| Brand                        | 1025                                      | 1.58                                                       | 59                                 | 1.40                            | -0.18                                                 |
| Ebnath                       | 1710                                      | 2.65                                                       | 65                                 | 1.55                            | -1.10                                                 |
| Erbendorf                    | 4476                                      | 6.91                                                       | 263                                | 6.26                            | -0.65                                                 |
| Falkenberg                   | 822                                       | 1.27                                                       | 73                                 | 1.74                            | 0.47                                                  |
| Friedenfels                  | 1103                                      | 1.70                                                       | 87                                 | 2.07                            | 0.37                                                  |
| Fuchsmühl                    | 1387                                      | 2.14                                                       | 87                                 | 2.07                            | -0.07                                                 |
| Immenreuth                   | 1600                                      | 2.47                                                       | 100                                | 2.38                            | -0.09                                                 |
| Kastl                        | 1208                                      | 1.87                                                       | 83                                 | 1.97                            | 0.10                                                  |
| Kemnath                      | 4773                                      | 7.37                                                       | 294                                | 7.00                            | -0.37                                                 |
| Konnernsreuth                | 1501                                      | 2.31                                                       | 109                                | 2.59                            | 0.28                                                  |
| Krummennaab                  | 1299                                      | 2.01                                                       | 85                                 | 2.02                            | 0.01                                                  |
| Kulmain                      | 1928                                      | 2.98                                                       | 136                                | 3.24                            | 0.26                                                  |
| Leonberg                     | 870                                       | 1.34                                                       | 69                                 | 1.64                            | 0.30                                                  |
| Mähring                      | 1560                                      | 2.41                                                       | 107                                | 2.55                            | 0.14                                                  |
| Mitterteich                  | 5899                                      | 9.11                                                       | 376                                | 8.95                            | -0.16                                                 |
| Neusorg                      | 1810                                      | 2.80                                                       | 131                                | 3.12                            | 0.32                                                  |
| Pechbrunn                    | 1173                                      | 1.81                                                       | 72                                 | 1.71                            | -0.10                                                 |
| Plößberg                     | 2835                                      | 4.38                                                       | 206                                | 4.90                            | 0.52                                                  |
| Pullenreuth                  | 1500                                      | 2.32                                                       | 110                                | 2.62                            | 0.30                                                  |
| Reuth b.Erbendorf            | 994                                       | 1.54                                                       | 71                                 | 1.69                            | 0.15                                                  |
| Tirschenreuth                | 7807                                      | 12.06                                                      | 547                                | 13.01                           | 0.95                                                  |
| Waldershof                   | 3869                                      | 5.98                                                       | 205                                | 4.88                            | -1.10                                                 |
| Waldsassen                   | 5862                                      | 9.05                                                       | 356                                | 8.47                            | -0.58                                                 |
| Wiesau                       | 3651                                      | 5.64                                                       | 230                                | 5.47                            | -0.17                                                 |

**Supplemental Table S2:** Goodness of fit of the latent class model incorporating three factors and two latent classes: comparison of observed frequencies of response patterns of the three antibody test results from complete observations (n=4185) and the expected frequencies derived from the model. Incomplete observations (n=16) have been included in the analysis as the missing at random assumption is not violated (p=0.69)

| Roche-Cobas | ELISA    | YHLO     | observed frequency | expected frequency from model <sup>1</sup> |
|-------------|----------|----------|--------------------|--------------------------------------------|
| negative    | negative | negative | 3753               | 3752.5                                     |
| negative    | negative | positive | 41                 | 40.8                                       |
| negative    | positive | negative | 13                 | 13.0                                       |
| negative    | positive | positive | 28                 | 28.4                                       |
| positive    | negative | negative | 17                 | 16.9                                       |
| positive    | negative | positive | 0                  | 0.6                                        |
| positive    | positive | negative | 19                 | 19.4                                       |
| positive    | positive | positive | 314                | 313.3                                      |

<sup>1</sup>Overall goodness of fit measures: BIC = 59.7 and AAIC = 66.7

**Supplemental Table S3:** Seroprevalence (SP), underreported infections (UI) factor and infection fatality ratio (IFR) in the study population and standardized to the population of the county Tirschenreuth

| Group                     | SP (%) | SP (%)<br>95%-CI <sup>6</sup> | PCR + <sup>2</sup><br>(%) | UI <sup>4</sup><br>factor | UI <sup>4</sup> factor<br>95%-CI <sup>7</sup> | IFR <sup>5</sup> (%) | IFR <sup>5</sup> (%)<br>95%-CI <sup>7</sup> |
|---------------------------|--------|-------------------------------|---------------------------|---------------------------|-----------------------------------------------|----------------------|---------------------------------------------|
| <b>overall</b>            |        |                               |                           |                           |                                               |                      |                                             |
| crude                     | 8.641  | 7.828 - 9.529                 |                           |                           |                                               |                      |                                             |
| standardized <sup>1</sup> | 8.571  | 7.768 - 9.449                 | 1.710                     | 5.013                     | 4.462 - 5.587                                 | 2.487                | 2.058 - 3.022                               |
| <b>men</b>                |        |                               |                           |                           |                                               |                      |                                             |
| crude                     | 8.567  | 7.427 - 9.864                 |                           |                           |                                               |                      |                                             |
| standardized <sup>2</sup> | 8.500  | 7.373 - 9.783                 | 1.434                     | 5.928                     | 4.978 - 6.939                                 | 2.806                | 2.171 - 3.669                               |
| <b>women</b>              |        |                               |                           |                           |                                               |                      |                                             |
| crude                     | 8.710  | 7.595 - 9.970                 |                           |                           |                                               |                      |                                             |
| standardized <sup>2</sup> | 8.641  | 7.540 - 9.888                 | 1.984                     | 4.355                     | 3.707 - 5.038                                 | 2.175                | 1.648 - 2.903                               |

<sup>1</sup> Standardized according to age, gender and municipality

<sup>2</sup> Standardized according to age and municipality

<sup>3</sup> Registered PCR positive (%) by local health authorities

<sup>4</sup> Underreported infections factor: Ratio of standardized seroprevalence (%) and registered positive PCR (%), respectively.

<sup>5</sup> IFR (%): Infection fatality ratio. Percentage of people who have died from or with CoV-2 infection relative to the calculated number of seropositive individuals

<sup>6</sup> Confidence intervals (CI) were estimated according to Wilson-Score-Method

<sup>7</sup> Confidence intervals (CI) were computed as Bayesian credibility intervals (see methods)

**Supplemental Table S4:** Age-specific seroprevalence (SP), underreported infections (UI) factor and infection fatality ratio (IFR) in the study cohort and standardized according to the gender and local municipality distribution of the population of the county Tirschenreuth

| Age group | SP (%) <sup>1</sup> | SP(%) <sup>1</sup> ;<br>95%-CI <sup>5</sup> | SP (%) <sup>2</sup> | SP(%) <sup>2</sup> ;<br>95%-CI <sup>5</sup> | Registered positive<br>PCR (# and (%)) | UI <sup>3</sup><br>factor | UI <sup>3</sup> factor;<br>95%-CI <sup>6</sup> | Number of<br>deaths | IFR <sup>4</sup><br>(%) | IFR <sup>4</sup> (%);<br>95%-CI <sup>6</sup> |
|-----------|---------------------|---------------------------------------------|---------------------|---------------------------------------------|----------------------------------------|---------------------------|------------------------------------------------|---------------------|-------------------------|----------------------------------------------|
| 14-19     | 10.177              | 6.878 - 14.808                              | 10.039              | 6.818 - 14.595                              | 33 (0.826)                             | 12.154                    | 6.749 - 19.322                                 | 0                   | 0                       | 0.000 - 0.993                                |
| 20-29     | 8.795               | 6.659 - 11.533                              | 8.676               | 6.588 - 11.367                              | 98 (1.203)                             | 7.212                     | 4.975 - 9.811                                  | 1                   | 0.141                   | 0.034 - 0.823                                |
| 30-39     | 6.154               | 4.478 - 8.402                               | 6.070               | 4.433 - 8.828                               | 105 (1.231)                            | 4.931                     | 3.258 - 6.845                                  | 0                   | 0                       | 0.000 - 0.749                                |
| 40-49     | 9.651               | 7.540 - 12.274                              | 9.519               | 7.455 - 12.098                              | 147 (1.674)                            | 5.687                     | 4.147 - 7.424                                  | 0                   | 0                       | 0.000 - 0.452                                |
| 50-59     | 9.989               | 8.179 - 12.146                              | 9.853               | 8.083 - 11.972                              | 217 (1.694)                            | 5.818                     | 4.522 - 7.247                                  | 5                   | 0.396                   | 0.172 - 0.956                                |
| 60-69     | 7.979               | 6.249 - 10.136                              | 7.871               | 6.179 - 9.990                               | 141 (1.354)                            | 5.812                     | 4.244 - 7.593                                  | 8                   | 0.976                   | 0.489 - 2.038                                |
| 70-74     | 9.052               | 5.997 - 13.441                              | 8.929               | 5.948 - 13.248                              | 65 (1.899)                             | 4.701                     | 2.678 - 7.089                                  | 13                  | 4.255                   | 2.289 - 8.961                                |
| 75-79     | 5.208               | 2.853 - 9.321                               | 5.138               | 2.847 - 9.189                               | 75 (2.239)                             | 2.295                     | 1.016 - 3.837                                  | 19                  | 11.040                  | 5.836 - 30.210                               |
| 80-84     | 9.938               | 6.210 - 15.533                              | 9.803               | 6.168 - 15.312                              | 110 (3.224)                            | 3.041                     | 1.605 - 4.622                                  | 31                  | 9.268                   | 5.563 - 18.820                               |
| 85+       | 10.417              | 4.532 - 22.168                              | 10.275              | 4.564 - 21.874                              | 116 (6.164)                            | 1.667                     | 1.001 - 3.119                                  | 61                  | 31.545                  | 16.437 - 99.046                              |

<sup>1</sup>Crude data as observed in the study population

<sup>2</sup>Standardized according to gender and municipality

<sup>3</sup>Underreported infections factor: Ratio of standardized seroprevalence (%) and registered positive PCR (%), respectively.

<sup>4</sup>IFR (%): Infection fatality ratio. Percentage of people who have died from or with SARS-CoV-2 infection relative to the calculated number of standardized seropositive individuals

<sup>5</sup>Confidence intervals (CI) were estimated according to Wilson-Score-Method

<sup>6</sup>Confidence intervals (CI) were computed as Bayesian credibility intervals (see methods)

**Supplemental Table S5:** Local seroprevalence (SP) in the study cohort and standardized according to the age and gender distribution of the population of the county Tirschenreuth

| Local Municipality | SP (%) <sup>1</sup> | SP (%) <sup>1</sup><br>95%-CI <sup>3</sup> | SP (%) <sup>2</sup> | SP (%) <sup>2</sup><br>95%-CI <sup>3</sup> |
|--------------------|---------------------|--------------------------------------------|---------------------|--------------------------------------------|
| Bad Neualbenreuth  | 7.527               | 3.694 - 14.730                             | 7.567               | 3.691 - 14.809                             |
| Brand              | 5.085               | 1.744 - 13.917                             | 5.111               | 1.726 - 13.986                             |
| Bärnau             | 8.466               | 5.278 - 13.308                             | 8.510               | 5.291 - 13.382                             |
| Ebnath             | 4.615               | 1.582 - 12.714                             | 4.640               | 1.565 - 12.777                             |
| Erbendorf          | 7.634               | 4.996 - 11.496                             | 7.674               | 5.011 - 11.561                             |
| Falkenberg         | 2.740               | 0.755 - 9.450                              | 2.754               | 0.738 - 9.495                              |
| Friedenfels        | 5.747               | 2.480 - 12.758                             | 5.778               | 2.471 - 12.824                             |
| Fuchsmühl          | 12.644              | 7.209 - 21.238                             | 12.711              | 7.221 - 21.354                             |
| Immenreuth         | 1.000               | 0.177 - 5.449                              | 1.005               | 0.164 - 5.471                              |
| Kastl              | 2.410               | 0.663 - 8.366                              | 2.422               | 0.648 - 8.406                              |
| Kemnath            | 1.701               | 0.729 - 3.919                              | 1.710               | 0.726 - 3.940                              |
| Konnersreuth       | 11.927              | 7.104 - 19.342                             | 11.990              | 7.120 - 19.448                             |
| Krummennaab        | 10.588              | 5.671 - 18.914                             | 10.644              | 5.676 - 19.016                             |
| Kulmain            | 5.147               | 2.515 - 10.243                             | 5.174               | 2.513 - 10.299                             |
| Leonberg           | 18.841              | 11.355 - 29.613                            | 18.940              | 11.384 - 29.773                            |
| Mitterteich        | 18.351              | 14.765 - 22.577                            | 18.448              | 14.833 - 22.702                            |
| Mähring            | 16.822              | 10.914 - 25.031                            | 16.911              | 10.949 - 25.168                            |
| Neusorg            | 6.107               | 3.127 - 11.588                             | 6.139               | 3.126 - 11.651                             |
| Pechbrunn          | 12.500              | 6.718 - 22.081                             | 12.566              | 6.724 - 22.200                             |
| Plößberg           | 6.341               | 3.743 - 10.546                             | 6.375               | 3.750 - 10.605                             |
| Pullenreuth        | 3.636               | 1.423 - 8.979                              | 3.656               | 1.414 - 9.025                              |
| Reuth b.Erbendorf  | 22.535              | 14.375 - 33.515                            | 22.654              | 14.420 - 33.696                            |
| Tirschenreuth      | 9.506               | 7.323 - 12.254                             | 9.557               | 7.354 - 12.323                             |
| Waldershof         | 3.902               | 1.990 - 7.510                              | 3.923               | 1.990 - 7.551                              |
| Waldsassen         | 8.427               | 5.966 - 11.775                             | 8.472               | 5.988 - 11.841                             |
| Wiesau             | 8.261               | 5.352 - 12.541                             | 8.305               | 5.368 - 12.611                             |

<sup>1</sup>Crude data as observed in the study population

<sup>2</sup>Standardised according to gender and age

<sup>3</sup>Confidence intervals (CI) were estimated according to Wilson-Score-Method.

**Supplemental table S6:** Seroprevalence (SP), Underreported infections (UI) factor and infection fatality ratio (IFR) in municipality subgroups with and without senior citizen residences in the county of Tirschenreuth

| Municipality subgroup             | # in county<br># in study<br># seropositives | SP (%) <sup>1</sup><br>95%-CI <sup>4</sup> | Registered positive PCR<br>#, % | UI <sup>2</sup><br>95%-CI <sup>5</sup> | Number of deaths | IFR (%) <sup>3</sup><br>95%-CI <sup>5</sup> |
|-----------------------------------|----------------------------------------------|--------------------------------------------|---------------------------------|----------------------------------------|------------------|---------------------------------------------|
| with senior citizen residences    | 43870<br>2802<br>248                         | 8.898<br>7.893 - 10.014                    | 888<br>2.024                    | 4.083<br>3.828 - 4.989                 | 125              | 3.202<br>2.609 - 3.967                      |
| without senior citizen residences | 20773<br>1399<br>115                         | 8.264<br>6.925- 9.831                      | 219<br>1.049                    | 8.482<br>6.279 - 9.656                 | 13               | 0.754<br>0.436 - 1.334                      |

<sup>1</sup>Standardised according to gender and age

<sup>2</sup>Underreported infections factor: Ratio of standardized seroprevalence (%) and registered positive PCR (%), respectively.

<sup>3</sup>IFR (%): Infection fatality ratio. Percentage of people who have died from or with CoV-2 infection relative to the calculated number of standardized seropositive individuals

<sup>4</sup>Confidence intervals (CI) were estimated according to Wilson-Score-Method

<sup>5</sup>Confidence intervals (CI) were computed as Bayesian credibility intervals (see methods)

**Supplemental Table S7. Report of bronchitis/pneumonia by serostatus.** Participants were asked whether they had experienced a bronchitis or pneumonia since the start of the pandemic (as per Feb 1st, 2020) and to what degree they had been affected. Bronchitis/pneumonia are the lead diseases with which individuals are hospitalized that are potential patients of COVID-19. We present the relative (%) and absolute (#) frequencies of individuals with Bronchitis in the overall sample and for different combinations of seropositivity and self-reported PCR test results and quantify the association of seropositivity with Bronchitis based on Odds ratios between seropositive and seronegative individuals (OR, with associated 95%-confidence interval, CI).

| <b>Bronchitis<br/>(since Feb)</b> | <b>Overall</b>       | <b>Seropositive AND<br/>PCR-test pos.</b> | <b>Seropositive AND<br/>no PCR-test or neg.</b> | <b>Seropositive</b> | <b>Seronegative</b>  | <b>OR [95%-CI]</b>  |
|-----------------------------------|----------------------|-------------------------------------------|-------------------------------------------------|---------------------|----------------------|---------------------|
| No % (#)                          | 91.3 (3799) [n=4162] | 70.1 (47) [n=67]                          | 83.2 (243) [n=292]                              | 80.8 (290) [n=359]  | 92.3 (3509) [n=3803] | 0.35 [0.26, 0.47]   |
| Affected, a little % (#)          | 4.4 (182) [n=4162]   | 4.5 (3) [n=67]                            | 5.5 (16) [n=292]                                | 5.3 (19) [n=359]    | 4.3 (163) [n=3803]   | 1.25 [0.77, 2.03]   |
| Affected, stayed in bed % (#)     | 1.5 (63) [n=4162]    | 4.5 (3) [n=67]                            | 4.1 (12) [n=292]                                | 4.2 (15) [n=359]    | 1.3 (48) [n=3803]    | 3.41 [1.89, 6.15]   |
| Affected, needed physician % (#)  | 2.3 (94) [n=4162]    | 4.5 (3) [n=67]                            | 6.2 (18) [n=292]                                | 5.8 (21) [n=359]    | 1.9 (73) [n=3803]    | 3.17 [1.93, 5.22]   |
| Affected, hospitalized % (#)      | 0.6 (24) [n=4162]    | 16.4 (11*) [n=67]                         | 1.0 (3) [n=292]                                 | 3.9 (14) [n=359]    | 0.3 (10) [n=3803]    | 15.39 [6.79, 34.91] |

\*Among the 18 individuals reporting to have been hospitalized since Feb 1<sup>st</sup>, 2020, due to COVID-19 disease (and having had a positive PCR-test), 11 reported to have been hospitalized due to bronchitis or pneumonia.

**Supplemental Table S8: Association of demographic and lifestyle factors with seropositivity.** Shown are Odds Ratios (OR) and 95%-confidence intervals as well as P-values from three logistic regression models. Participants were asked in which profession they were mostly working in February 2020, whether and how much they were smoking and drinking alcohol at the time of the questionnaire completion (from June 19<sup>th</sup>, 10 days prior to 1<sup>st</sup> day of the blood draws, until the last day of the blood draws), which was 1-3 weeks before the blood draw to derive serum antibody status. Body-mass-index was derived from self-reported weight and height in the questionnaire and physical activity was assessed as any of category of  $\geq 1$  hours per week (medium/high) versus  $< 1$  hours per week (including walking and biking). CI = confidence interval

| Covariate<br>[reference]            | Cat      | Model I |        |      |       | Model II |        |      |        | Model III |        |      |        |
|-------------------------------------|----------|---------|--------|------|-------|----------|--------|------|--------|-----------|--------|------|--------|
|                                     |          | OR      | 95%-CI | P    |       | OR       | 95%-CI | P    |        | OR        | 95%-CI | P    |        |
| Intercept*                          |          | 0.09    | 0.07   | 0.10 | -     | 0.08     | 0.05   | 0.11 | -      | 0.09      | 0.05   | 0.14 | -      |
| Age<br>[20-69]                      | 14-19    | 1.20    | 0.75   | 1.84 | 0.422 | 1.20     | 0.72   | 1.92 | 0.463  | 1.24      | 0.72   | 2.05 | 0.427  |
|                                     | 70+      | 0.95    | 0.69   | 1.28 | 0.740 | 1.06     | 0.73   | 1.50 | 0.750  | 0.95      | 0.65   | 1.38 | 0.799  |
| Sex [male]                          | female   | 1.02    | 0.82   | 1.26 | 0.871 | 0.93     | 0.73   | 1.17 | 0.519  | 1.02      | 0.78   | 1.32 | 0.906  |
| Education years<br>[6-10]           | 11-15    | -       | -      | -    | -     | 1.07     | 0.84   | 1.37 | 0.582  | 0.96      | 0.75   | 1.25 | 0.775  |
|                                     | 16-23    | -       | -      | -    | -     | 0.94     | 0.6    | 1.43 | 0.771  | 0.85      | 0.54   | 1.31 | 0.481  |
| Person<br>household<br>[1]          | 2        | -       | -      | -    | -     | 0.89     | 0.62   | 1.32 | 0.565  | 0.87      | 0.59   | 1.31 | 0.482  |
|                                     | 3-5      | -       | -      | -    | -     | 1.05     | 0.73   | 1.55 | 0.793  | 0.99      | 0.67   | 1.49 | 0.963  |
|                                     | 6+       | -       | -      | -    | -     | 1.05     | 0.58   | 1.85 | 0.860  | 0.96      | 0.52   | 1.73 | 0.902  |
| Profession<br>[other]               | grocery  | -       | -      | -    | -     | 0.87     | 0.36   | 1.77 | 0.725  | 0.82      | 0.31   | 1.76 | 0.637  |
|                                     | medicine | -       | -      | -    | -     | 2.13     | 1.46   | 3.07 | <0.001 | 2.26      | 1.53   | 3.28 | <0.001 |
| Phys. Activity [high]               | low      | -       | -      | -    | -     | -        | -      | -    | -      | 0.93      | 0.71   | 1.21 | 0.577  |
| Alcohol<br>drinks / day<br>[0-0.25] | 0        | -       | -      | -    | -     | -        | -      | -    | -      | 0.76      | 0.52   | 1.09 | 0.144  |
|                                     | 0.25-1   | -       | -      | -    | -     | -        | -      | -    | -      | 1.28      | 0.95   | 1.72 | 0.101  |
|                                     | >1       | -       | -      | -    | -     | -        | -      | -    | -      | 1.33      | 0.96   | 1.85 | 0.860  |
| BMI<br>[18.5-25]                    | <18.5    | -       | -      | -    | -     | -        | -      | -    | -      | 1.16      | 0.39   | 2.80 | 0.760  |
|                                     | 25-30    | -       | -      | -    | -     | -        | -      | -    | -      | 1.14      | 0.86   | 1.50 | 0.367  |
|                                     | >30      | -       | -      | -    | -     | -        | -      | -    | -      | 1.05      | 0.76   | 1.43 | 0.781  |
| Smoking<br>[never]                  | ex       | -       | -      | -    | -     | -        | -      | -    | -      | 0.97      | 0.74   | 1.27 | 0.843  |
|                                     | current  | -       | -      | -    | -     | -        | -      | -    | -      | 0.36      | 0.24   | 0.53 | <0.001 |

\* Intercept corresponds to estimated probability of seropositivity in reference categories



**Supplemental Table S9: (a)** Odds-ratios and corresponding 95%-CIs (Wald) by age-groups and sex (current smoking vs. serostatus positive), young=14-39, middle age=40-59, old  $\geq 60$ . **(b)** Odds-ratios and corresponding 95%-CIs (Wald) by age-sex group (current smoking vs. PCR-test positive if tested), young=14-39, middle age=40-59, old  $\geq 60$

| Group    |                | n           | # pos      | # smoke    | % pos. smoke | % pos. non-smoke | OR           | 95%-CI                |
|----------|----------------|-------------|------------|------------|--------------|------------------|--------------|-----------------------|
| <b>a</b> | <b>Overall</b> | <b>4176</b> | <b>363</b> | <b>852</b> | <b>4.2</b>   | <b>9.8</b>       | <b>0.404</b> | <b>[0.284, 0.575]</b> |
|          | Age-group      |             |            |            |              |                  |              |                       |
|          | young          | 1332        | 105        | 297        | 4.0          | 9.0              | 0.426        | [0.230, 0.789]        |
|          | mid            | 1476        | 146        | 370        | 4.3          | 11.8             | 0.339        | [0.199, 0.578]        |
|          | old            | 1368        | 112        | 185        | 4.3          | 8.8              | 0.469        | [0.225, 0.979]        |
|          | Sex            |             |            |            |              |                  |              |                       |
|          | male           | 2021        | 174        | 441        | 3.4          | 10.1             | 0.315        | [0.183, 0.540]        |
|          | female         | 2155        | 189        | 411        | 5.1          | 9.6              | 0.505        | [0.317, 0.806]        |
|          | Age x Sex      |             |            |            |              |                  |              |                       |
|          | young, male    | 650         | 41         | 163        | 3.1          | 7.4              | 0.396        | [0.153, 1.028]        |
|          | young, female  | 682         | 64         | 134        | 5.2          | 10.4             | 0.475        | [0.211, 1.066]        |
|          | mid, male      | 721         | 76         | 185        | 2.7          | 13.2             | 0.182        | [0.072, 0.458]        |
|          | mid, female    | 755         | 70         | 185        | 5.9          | 10.4             | 0.548        | [0.281, 1.066]        |
|          | old, male      | 650         | 57         | 93         | 5.4          | 9.3              | 0.552        | [0.214, 1.420]        |
|          | old, female    | 718         | 55         | 92         | 3.3          | 8.3              | 0.372        | [0.114, 1.217]        |
| <b>b</b> | <b>Overall</b> | <b>501</b>  | <b>74</b>  | <b>105</b> | <b>6.7</b>   | <b>16.9</b>      | <b>351</b>   | <b>[0.156, 0.789]</b> |
|          | Age-group      |             |            |            |              |                  |              |                       |
|          | young          | 145         | 16         | 34         | 2.9          | 13.5             | 194          | [0.025, 1.525]        |
|          | mid            | 216         | 30         | 58         | 5.2          | 17.1             | 265          | [0.077, 0.909]        |
|          | old            | 140         | 28         | 13         | 23.1         | 19.7             | 224          | [0.313, 4.780]        |
|          | Sex            |             |            |            |              |                  |              |                       |
|          | male           | 190         | 39         | 31         | 9.7          | 22.6             | 366          | [0.105, 1.274]        |
|          | female         | 311         | 35         | 74         | 5.4          | 13.1             | 38           | [0.129, 1.114]        |
|          | Age x Sex      |             |            |            |              |                  |              |                       |
|          | young, male    | 49          | 7          | 11         | 0            | 18.4             | -            | -                     |
|          | young, female  | 96          | 9          | 23         | 4.3          | 11.0             | 369          | [0.044, 3.120]        |
|          | mid, male      | 74          | 13         | 14         | 7.1          | 20.0             | 308          | [0.037, 2.589]        |
|          | mid, female    | 142         | 17         | 44         | 4.5          | 15.3             | 263          | [0.058, 1.206]        |
|          | old, male      | 67          | 19         | 6          | 33.3         | 27.9             | 294          | [0.217, 7.730]        |
|          | old, female    | 73          | 9          | 7          | 14.3         | 12.1             | 208          | [0.128, 11.377]       |

**Supplemental Table S10:** Dose-response models for seropositivity versus seronegativity. Shown are results from logistic regression modeling a linear effect of the number of smoked cigarettes on the binary outcome

| <b>All participants (Non-smokers with 0 cigarettes per day)</b> |          |      |        |      |        |
|-----------------------------------------------------------------|----------|------|--------|------|--------|
| Covariate<br>[reference]                                        | Cat      | OR   | 95%-CI |      | P      |
| Intercept*                                                      |          | 0.10 | 0.08   | 0.11 | -      |
| Age<br>[20-69]                                                  | 14-19    | 1.07 | 0.67   | 1.64 | 0.773  |
|                                                                 | 70+      | 0.85 | 0.62   | 1.15 | 0.317  |
| Sex [male]                                                      | female   | 0.99 | 0.80   | 1.23 | 0.926  |
| #Cigs                                                           | (per 10) | 0.50 | 0.37   | 0.65 | <0.001 |
| <b>Current smoker</b>                                           |          |      |        |      |        |
| Covariate<br>[reference]                                        | Cat      | OR   | 95%-CI |      | P      |
| Intercept*                                                      |          | 0.05 | 0.02   | 0.10 | -      |
| Age<br>[20-69]                                                  | 14-19    | 1.70 | 0.26   | 6.51 | 0.501  |
|                                                                 | 70+      | 1.68 | 0.39   | 5.01 | 0.411  |
| Sex [male]                                                      | female   | 1.46 | 0.74   | 2.93 | 0.281  |
| #Cigs                                                           | (per 10) | 0.69 | 0.43   | 1.07 | 0.108  |

\* Intercept corresponds to estimated probability of seropositivity in reference categories
