# Supplementary material for: Estimates and Determinants of SARS-Cov-2 Seroprevalence and Infection Fatality Ratio Using Latent Class Analysis: The Population-Based Tirschenreuth Study in the Hardest-Hit German County in Spring 2020
Source: Viruses. 2021 Jun 10;13(6):1118. doi: 10.3390/v13061118 (PMC8230374; doi:10.3390/v13061118)
Supplement: Supplementary file 1 [file viruses-13-01118-s001.zip]

Archive with 4 entries (4 files):
- 21-06-08 Legends_figures Supplement_finalized.pdf
- 21-06-08 Supplementary note_finalized.pdf
- 21-06-08 Tables Supplement_finalized.pdf
- Supplement-Figures S1 and S2.pdf
